# Supplementary material
Source: Springer Nature journal article supplement (https://www.springermedizin.de/resource/supplementary/13102_2013_26_MOESM5_ESM.pdf/9686434)

● Breaststroke  
○ Freestyle

### 50m Women

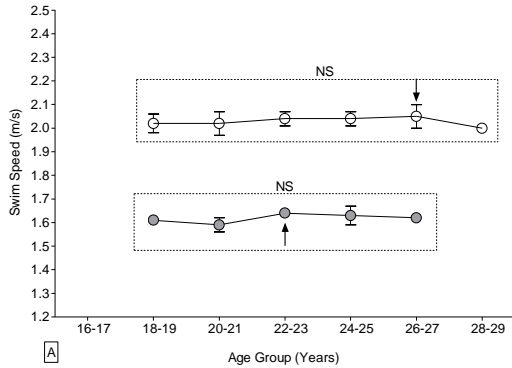

A

### 50m Men

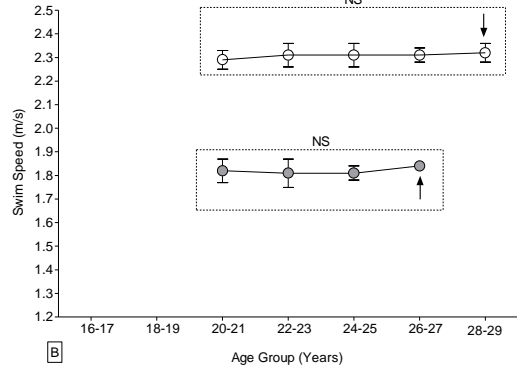

B

### 100m Women

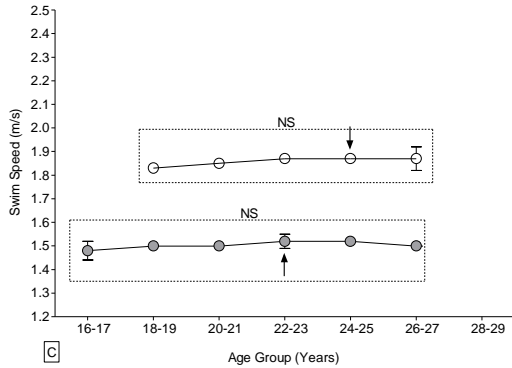

C

### 100m Men

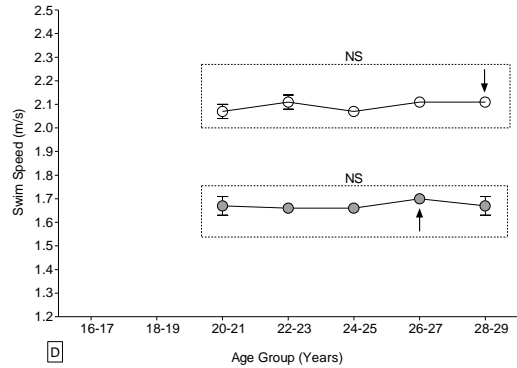

D

### 200m Women

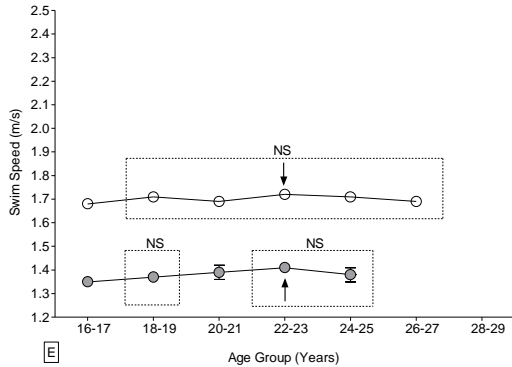

E

### 200m Men

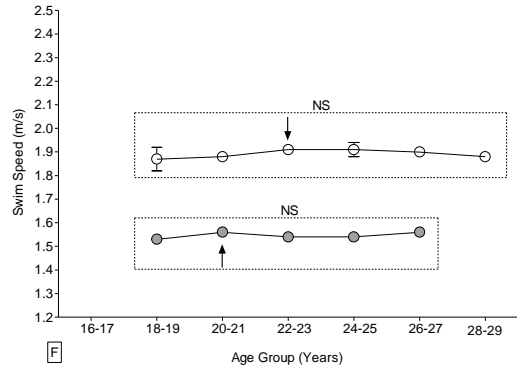

F

Supplement: MOESM5 [file 9686434]
